# Supplementary material for: Structural and functional biomimetics of [Fe]-hydrogenase featuring a mono-, di- or tetrasubstituted pyridine ligand with a fac-C, N, and S ligation
Source: Royal Society of Chemistry journal article supplement (doi:10.1039/d3dt01285a), 2023-01-01
Supplement: d3dt01285a1.pdf [file d3dt01285a1.pdf]

## Supporting Information

### Structural and functional biomimetics of [Fe]-hydrogenase featuring a mono-, di- or tetrasubstituted pyridine ligand with a *fac*-C, N, S ligation

Li-Cheng Song,\* Zhen-Qing Zhang and Bei-Bei Liu

#### Contents:

1. IR and  $^1\text{H}$  ( $^{13}\text{C}$ ) NMR spectra of model **1** (Fig. S1–S3)
2. IR and  $^1\text{H}$  ( $^{13}\text{C}$ ) NMR spectra of model **2** (Fig. S4–S6)
3. IR and  $^1\text{H}$  ( $^{13}\text{C}$ ) NMR spectra of model **3** (Fig. S7–S9)
4. IR and  $^1\text{H}$  ( $^{13}\text{C}$ ) NMR spectra of model **4** (Fig. S10–S12)
5. IR and  $^1\text{H}$  ( $^{13}\text{C}$ ) NMR spectra of model **5** (Fig. S13–S15)
6. IR and  $^1\text{H}$  ( $^{13}\text{C}$ ) NMR spectra of model **6** (Fig. S16–S18)
7. IR and  $^1\text{H}$  ( $^{13}\text{C}$ ) NMR spectra of complex **7** (Fig. S19–S21)
8. IR and  $^1\text{H}$  ( $^{13}\text{C}$ ) NMR spectra of complex **8** (Fig. S22–S24)
9. Product Im-H isolated from reactions of  $\text{ImBF}_4$  with  $\text{H}_2$  in the presence of  $\text{AgBF}_4$  and  $\text{Et}_3\text{N}$  catalyzed by models **1–6** in a synthetic scale
10. Reactions of  $\text{ImBF}_4$  with  $\text{H}_2$  in the presence of  $\text{AgBF}_4$  and  $\text{Et}_3\text{N}$  catalyzed by models **1–6** and their *in situ*  $^1\text{H}$  NMR spectra of the resulting reaction solutions (Fig. S25–S30)

1. IR and  $^1\text{H}$  ( $^{13}\text{C}$ ) NMR spectra of model 1 (Fig. S1–S3)

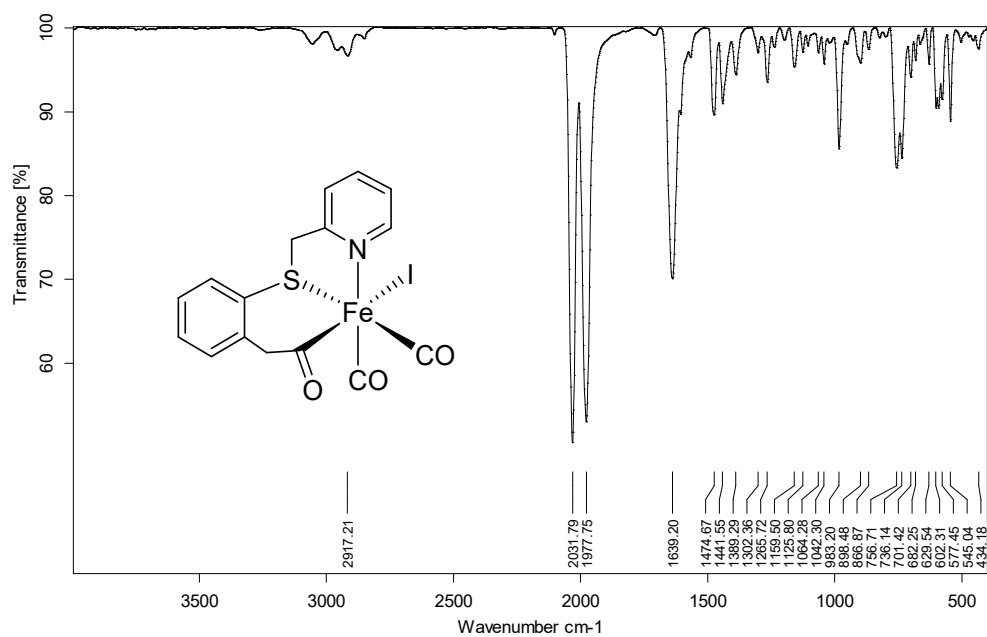

Fig. S1 IR spectrum of model 1.

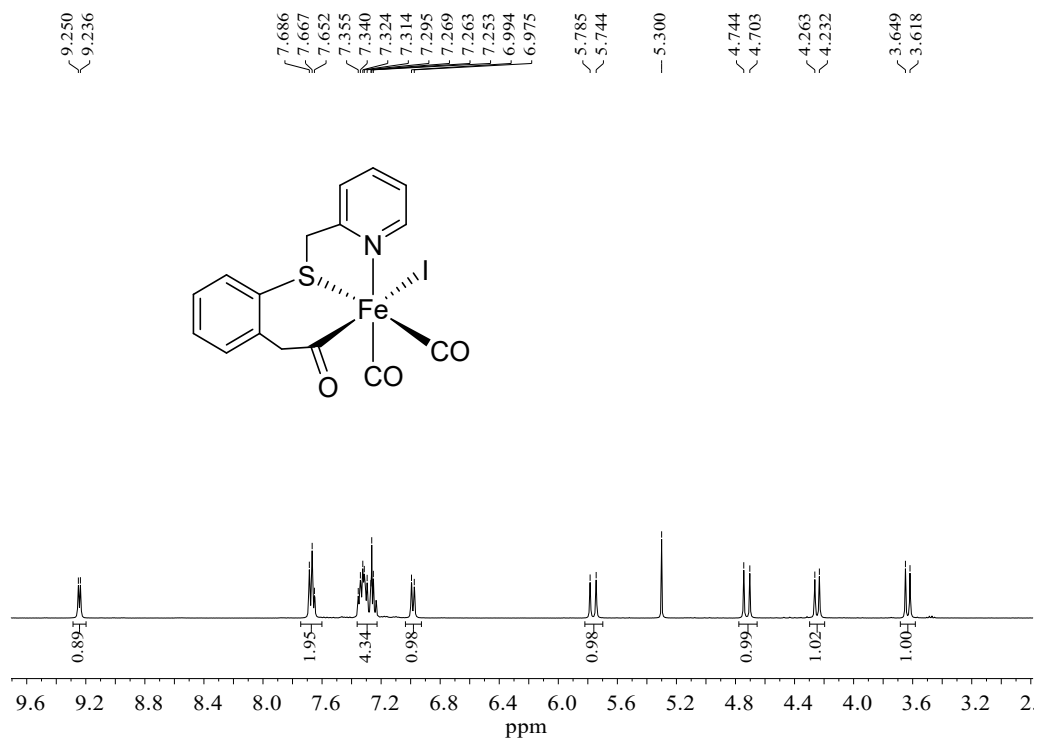

Fig. S2  $^1\text{H}$  NMR spectrum of model 1 in  $\text{CDCl}_3$ .

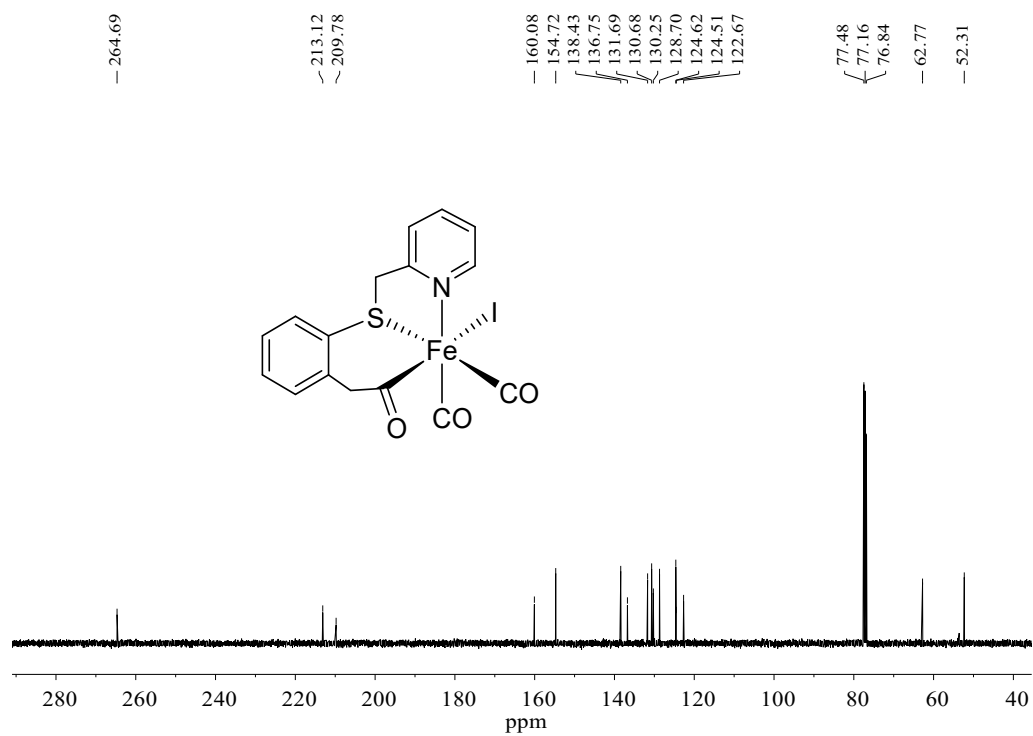

**Fig. S3**  $^{13}\text{C}$  NMR spectrum of model **1** in  $\text{CDCl}_3$ .

2. IR and  $^1\text{H}$  ( $^{13}\text{C}$ ) NMR spectra of model 2 (Fig. S4–S6)

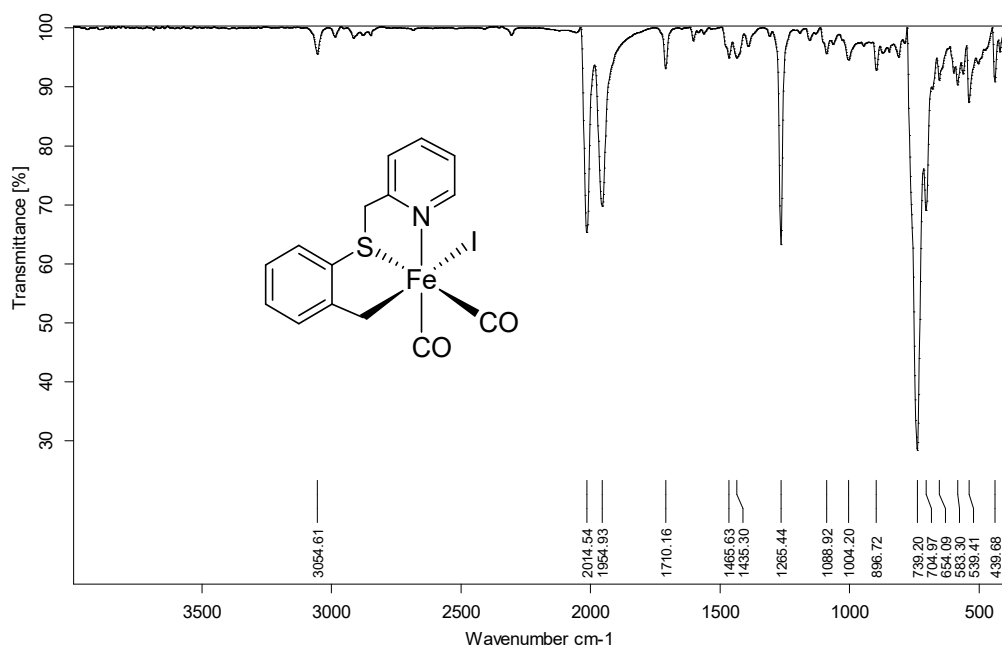

Fig. S4 IR spectrum of model 2.

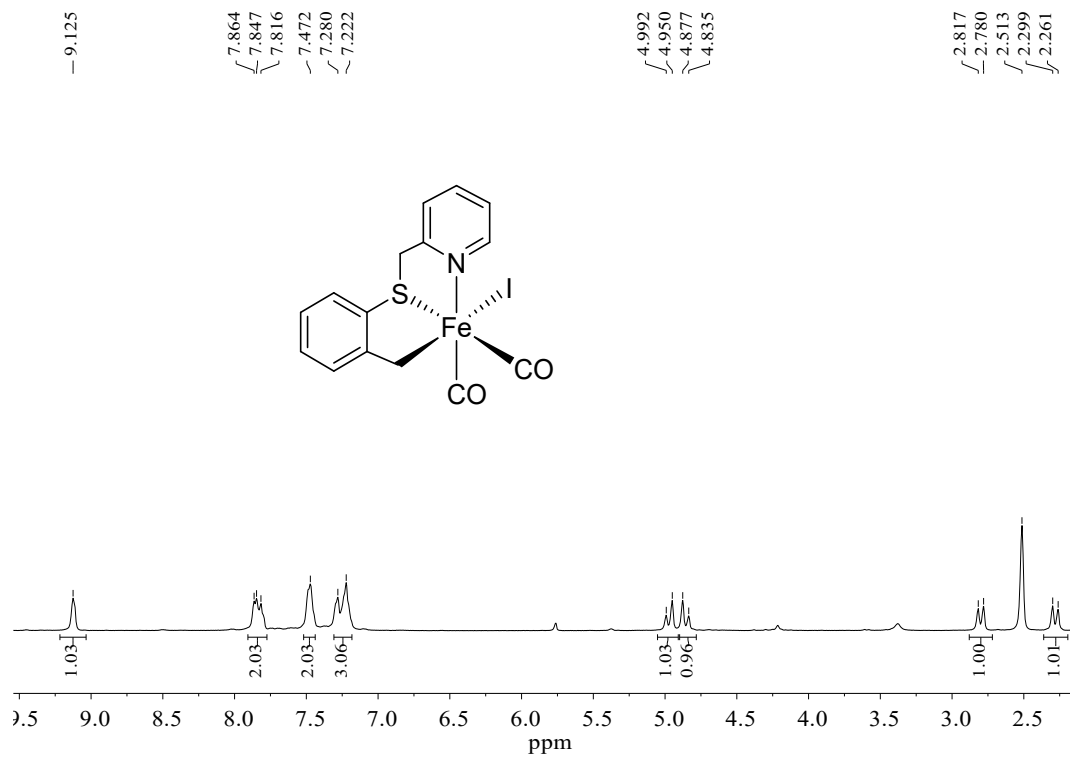

Fig. S5  $^1\text{H}$  NMR spectrum of model 2 in  $d^6$ -DMSO.

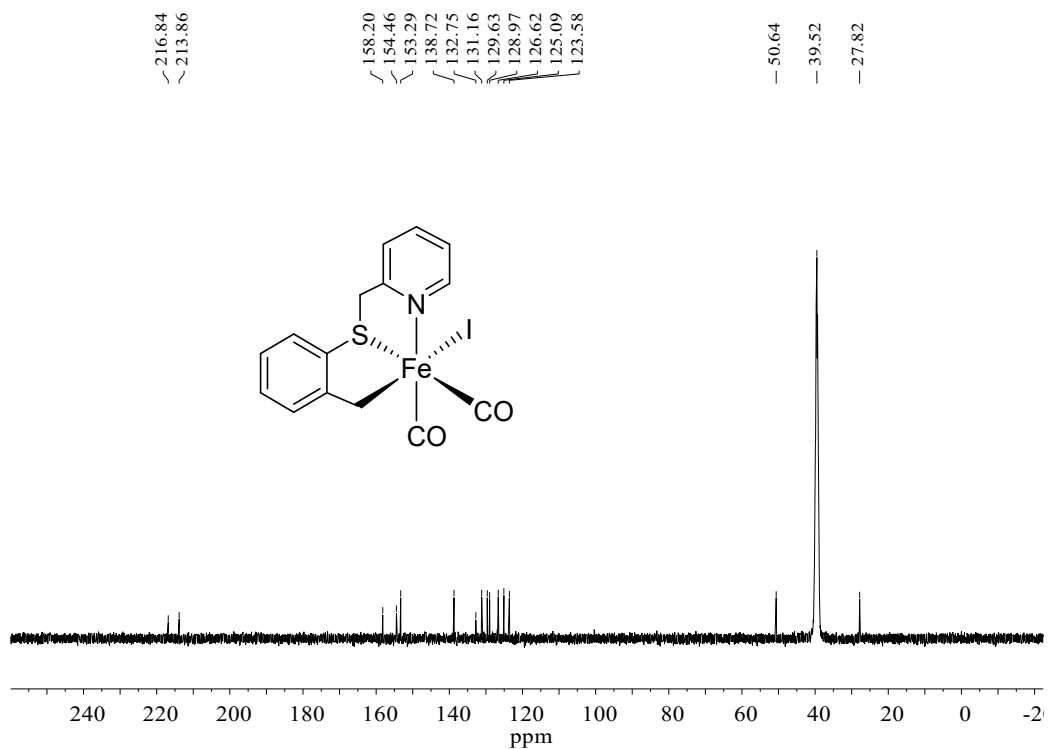

**Fig. S6**  $^{13}\text{C}$  NMR spectrum of model 2 in  $d^6$ -DMSO.

### 3. IR and $^1\text{H}$ ( $^{13}\text{C}$ ) NMR spectra of model **3** (Fig. S7–S9)

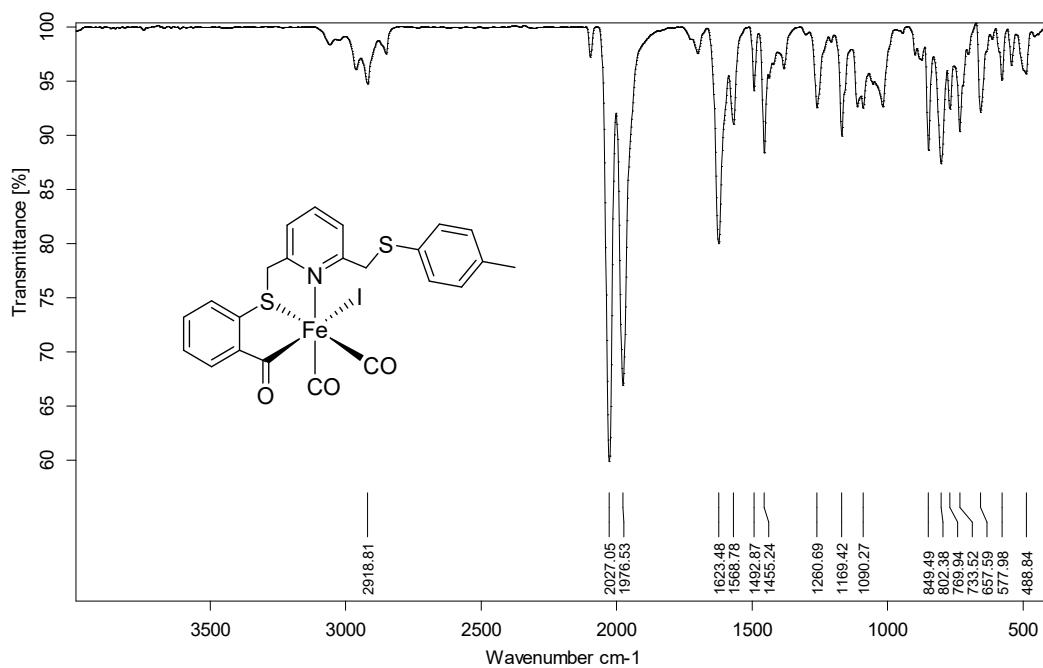

**Fig. S7** IR spectrum of model **3**.

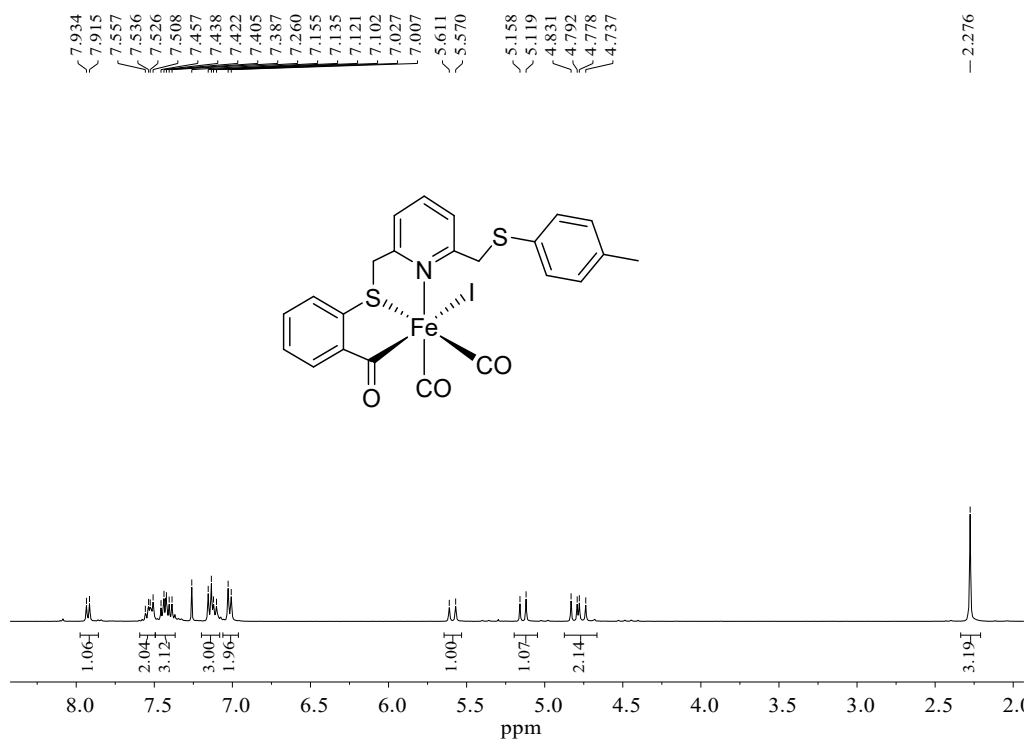

**Fig. S8**  $^1\text{H}$  NMR spectrum of model **3** in  $\text{CDCl}_3$ .

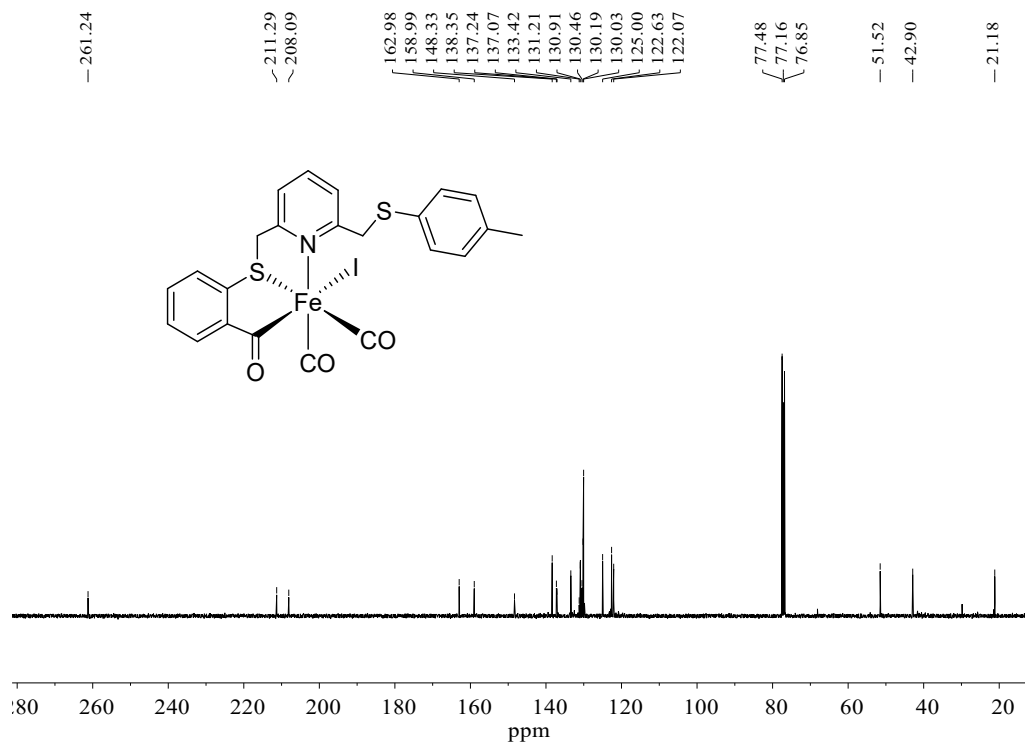

**Fig. S9**  $^{13}\text{C}$  NMR spectrum of model **3** in  $\text{CDCl}_3$ .

4. IR and  $^1\text{H}$  ( $^{13}\text{C}$ ) NMR spectra of model 4 (Fig. S10–S12)

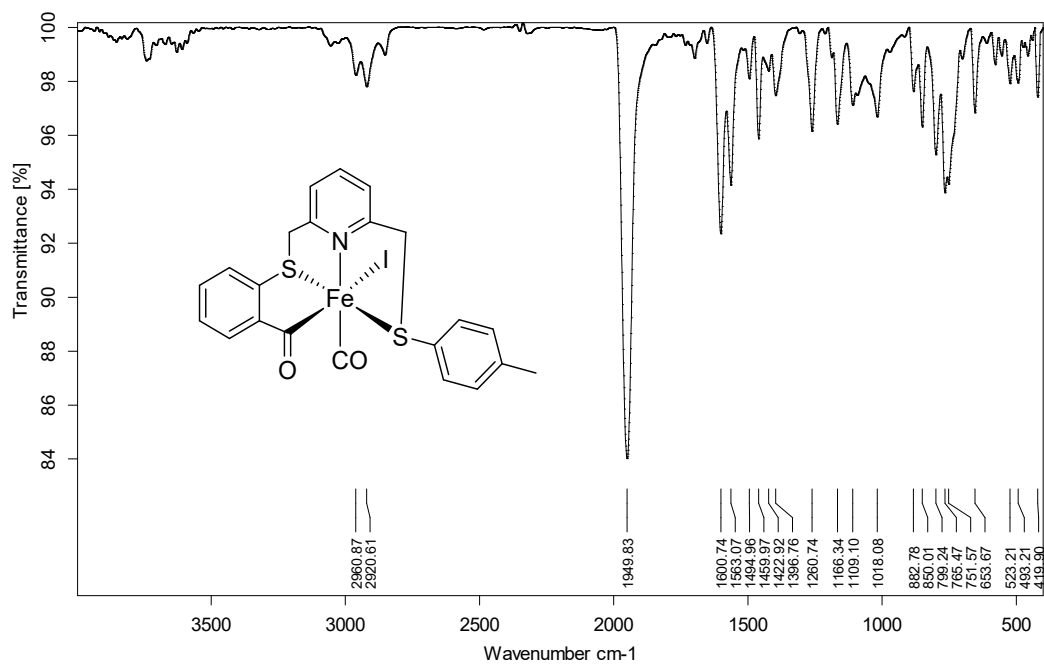

Fig. S10 IR spectrum of model 4.

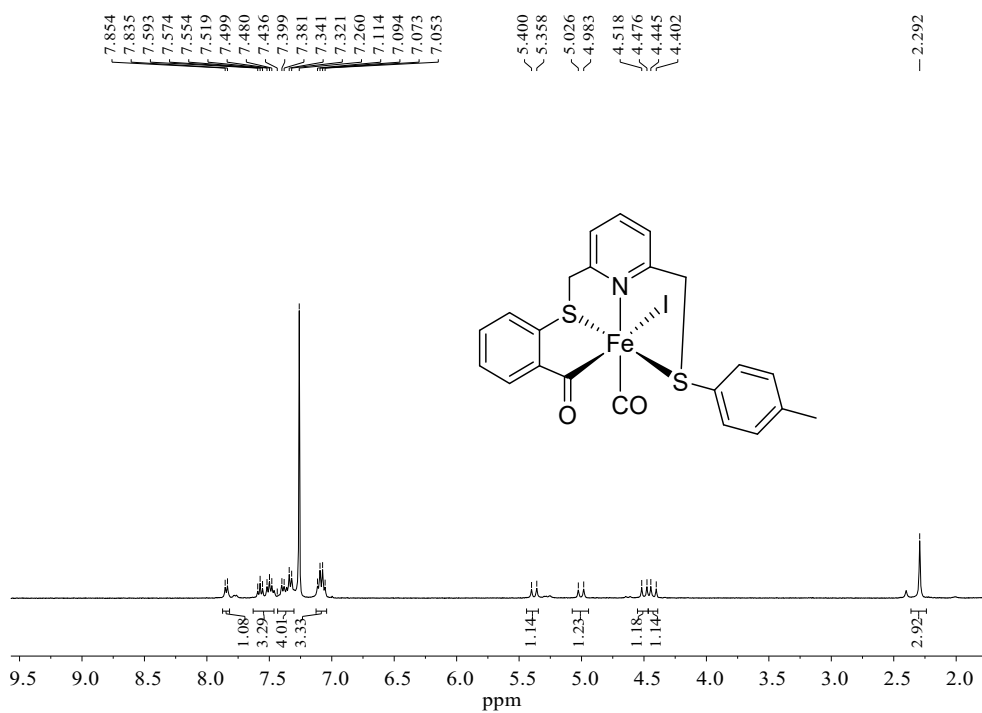

Fig. S11  $^1\text{H}$  NMR spectrum of model 4 in  $\text{CDCl}_3$ .



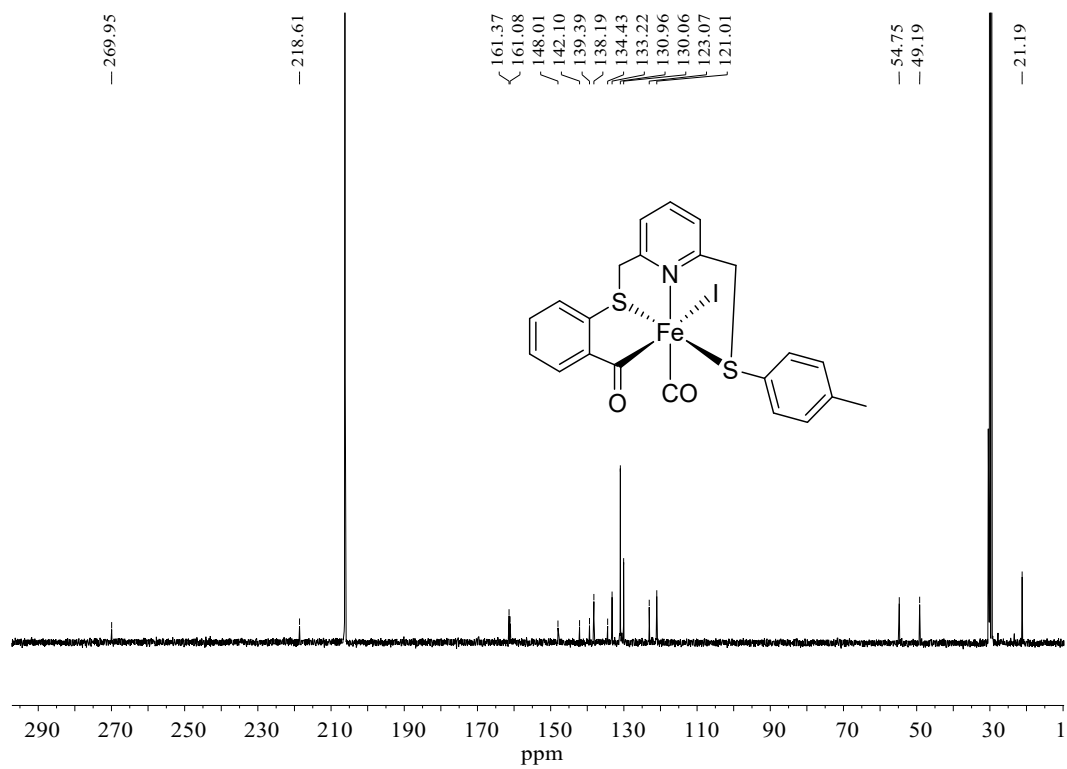

**Fig. S12**  $^{13}\text{C}$  NMR spectrum of model 4 in acetone- $d_6$





6. IR and  $^1\text{H}$  ( $^{13}\text{C}$ ) NMR spectra of model **6** (Fig. S16–S18)

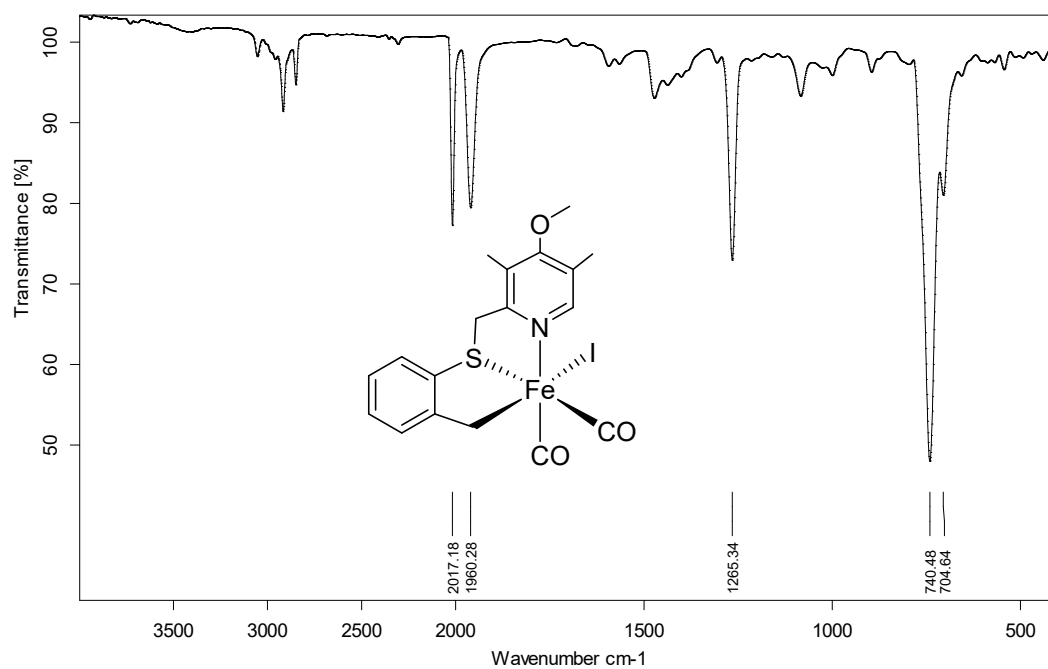

**Fig. S16** IR spectrum of model **6**.

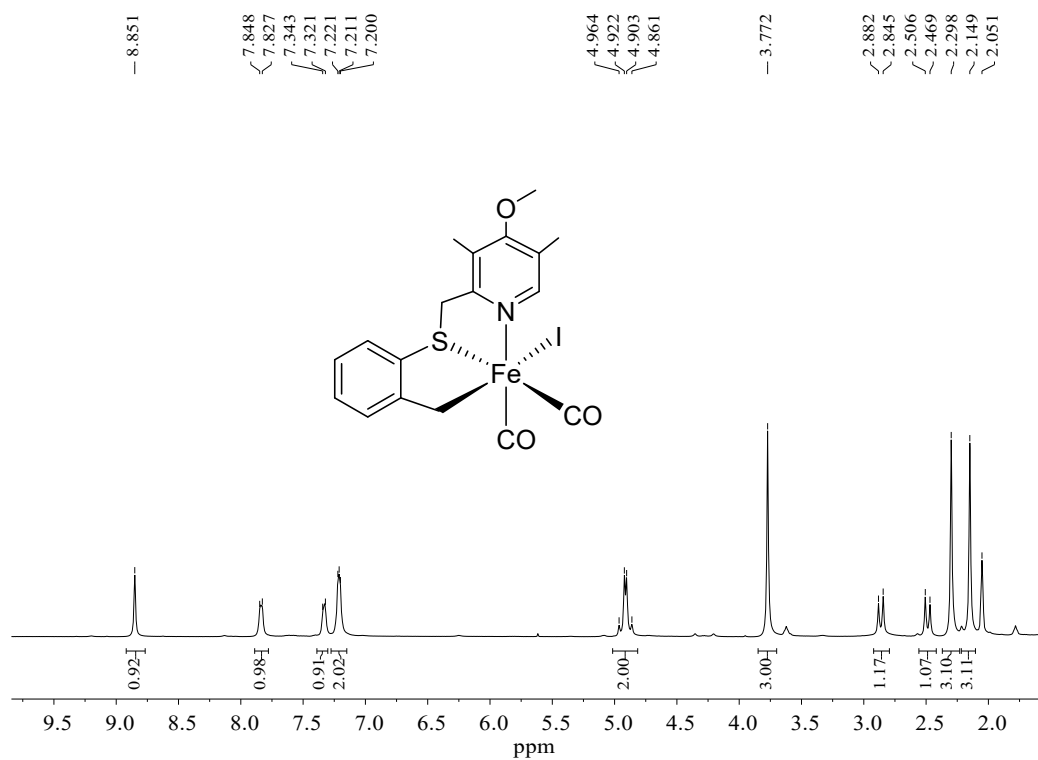

**Fig. S17**  $^1\text{H}$  NMR spectrum of model **6** in acetone- $d_6$ .

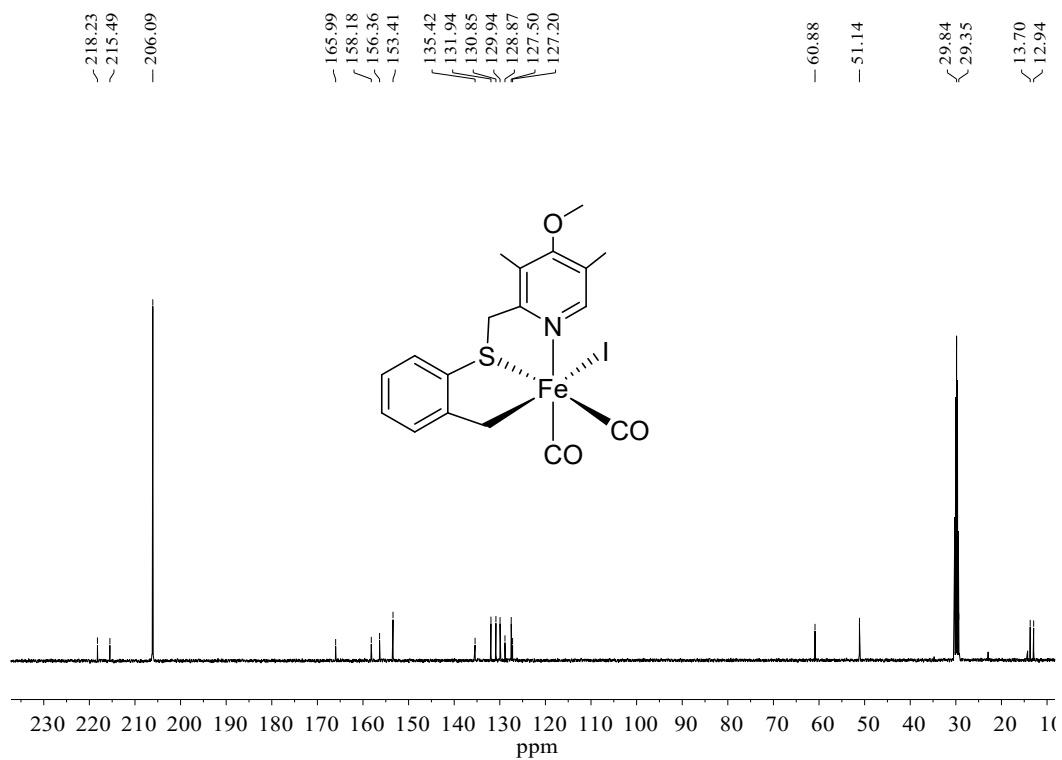

**Fig. S18**  $^{13}\text{C}$  NMR spectrum of model **6** in acetone- $d_6$ .

7. IR and  $^1\text{H}$  ( $^{13}\text{C}$ ) NMR spectra of complex **7** (Fig. S19–S21)

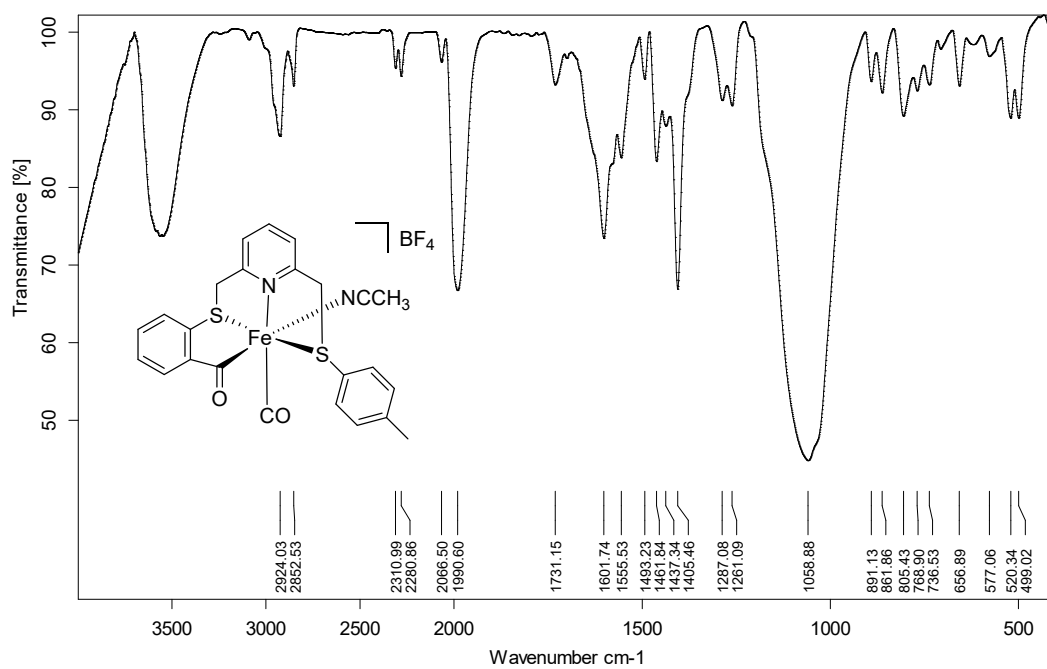

**Fig. S19** IR spectrum of complex **7**.

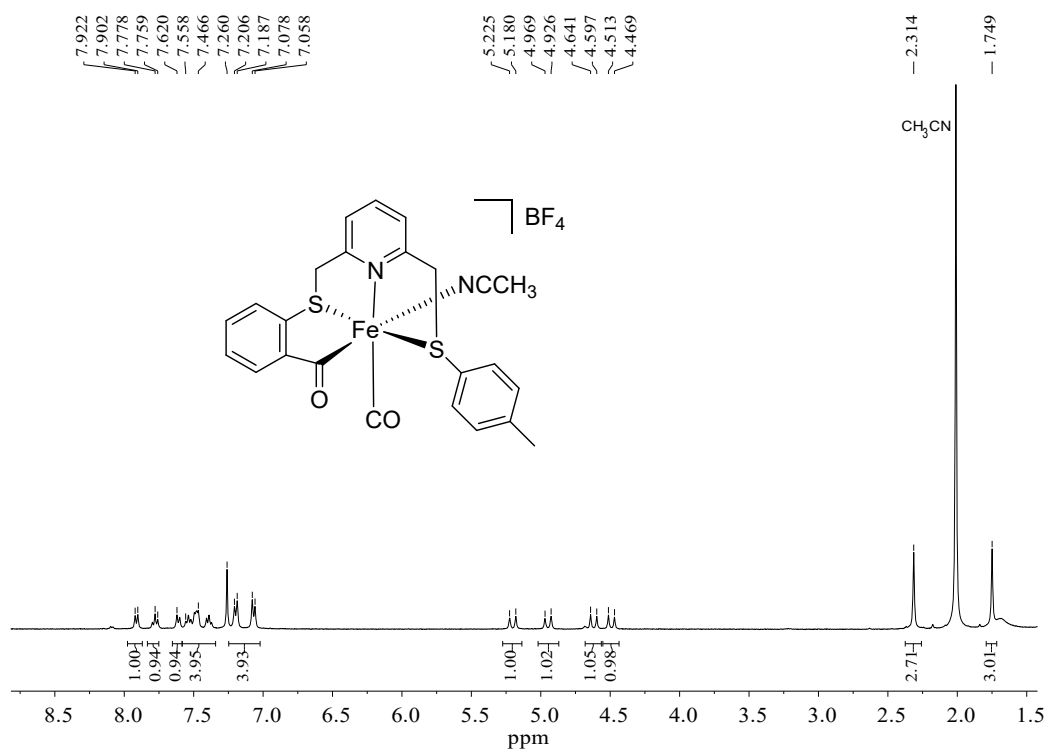

**Fig. S20**  $^1\text{H}$  NMR spectrum of complex **7** in  $\text{CDCl}_3$ .

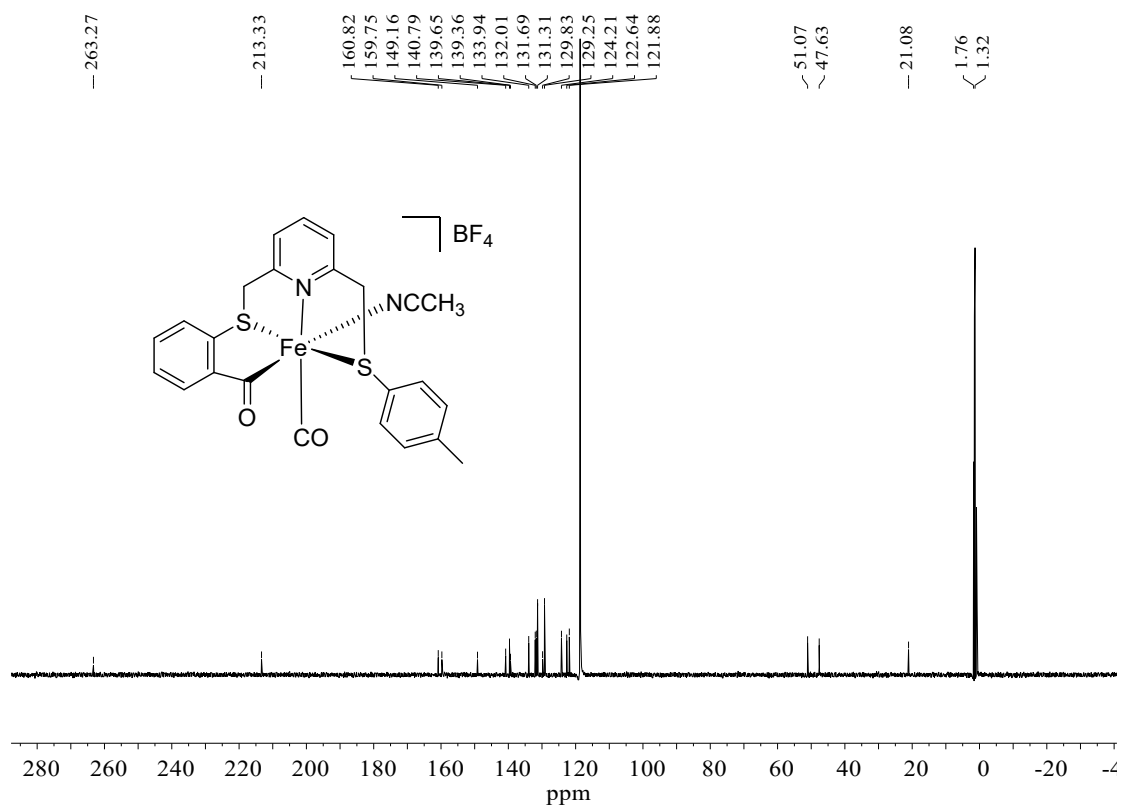

**Fig. S21**  $^{13}\text{C}$  NMR spectrum of complex **7** in acetonitril- $d_3$ .

8. IR and  $^1\text{H}$  ( $^{13}\text{C}$ ) NMR spectra of complex **8** (Fig. S22–S24)

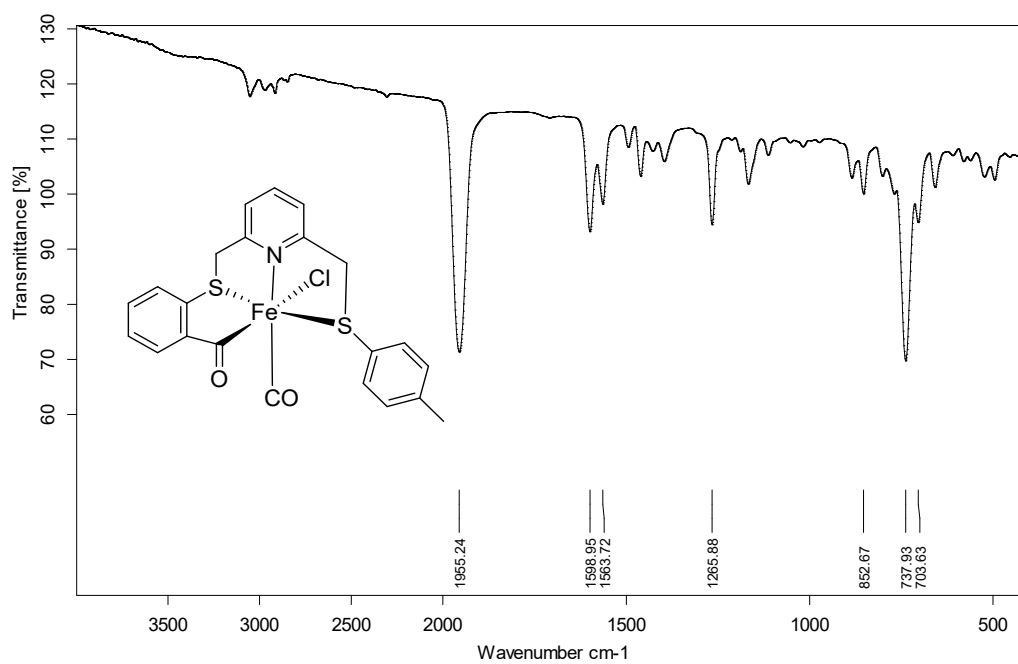

**Fig. S22** IR spectrum of complex **8**.

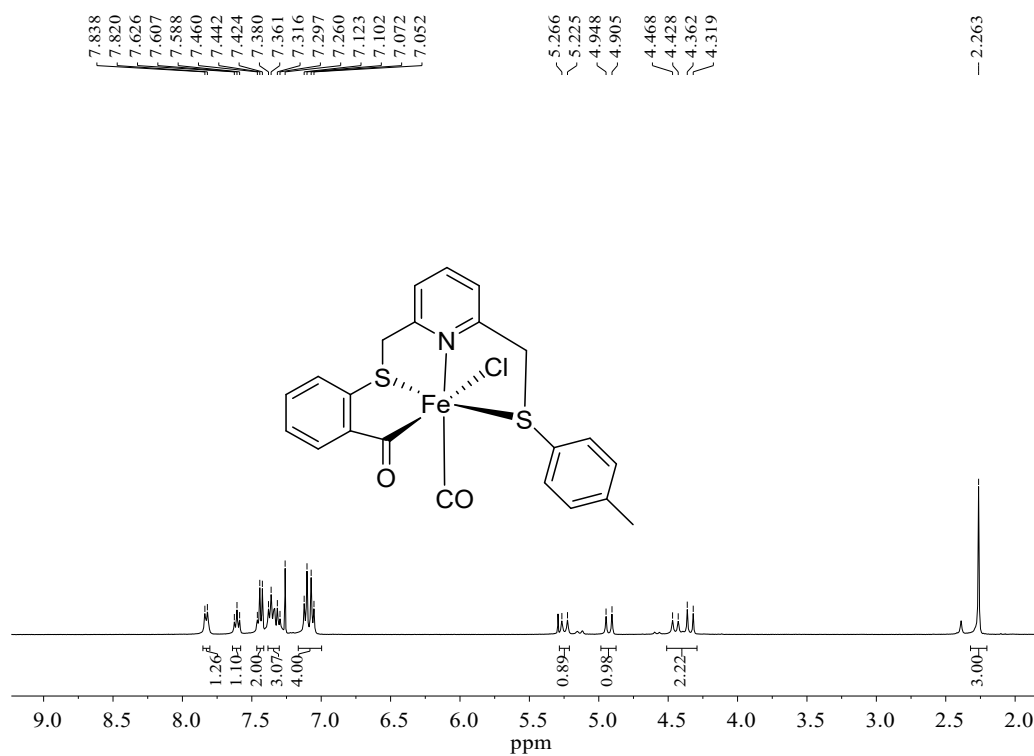

**Fig. S23**  $^1\text{H}$  NMR spectrum of complex **8** in  $\text{CDCl}_3$ .



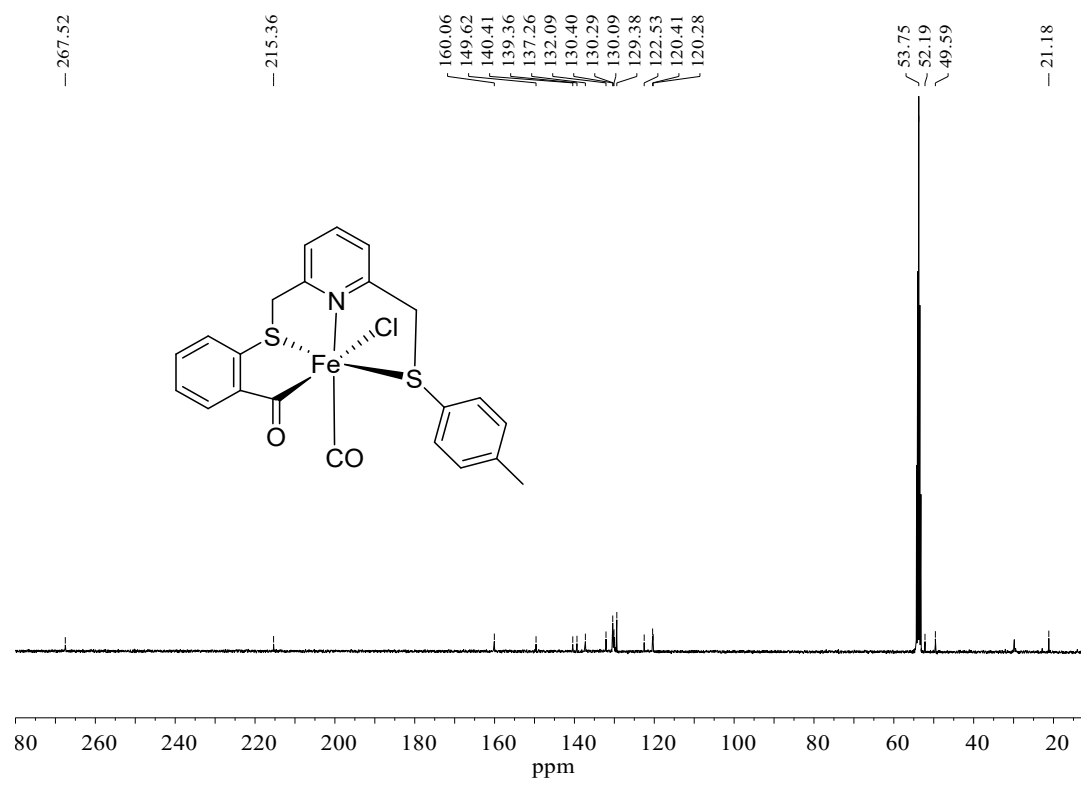

**Fig. S24**  $^{13}\text{C}$  NMR spectrum of complex **8** in  $\text{CD}_2\text{Cl}_2$ .

9. Product Im-H isolated from reactions of ImBF<sub>4</sub> with H<sub>2</sub> in the presence of AgBF<sub>4</sub> and Et<sub>3</sub>N catalyzed by models **1–6** in a synthetic scale

(i) Product Im-H isolated from reaction of ImBF<sub>4</sub> with H<sub>2</sub> catalyzed by model **1**

In an argon-filled glove box, a mixture of model **1** (12 mg, 25 μmol), AgBF<sub>4</sub> (5 mg, 25 μmol), ImBF<sub>4</sub> (77.5 mg, 250 μmol), Et<sub>3</sub>N (35 μL, 250 μmol) and CHCl<sub>3</sub> (3.0 mL) was added to a 30 mL autoclave's inner sleeve (made of PTFE) containing a magnetic stir-bar. The inner sleeve was put to the autoclave and then the autoclave was sealed. After 1.0 MPa of H<sub>2</sub> was filled and released three times, the mixture was stirred under 1.0 MPa H<sub>2</sub> at room temperature for 8. Solvent was removed at reduced pressure to give a residue, which was subjected to silica gel column chromatography. Elution with CH<sub>2</sub>Cl<sub>2</sub>/hexane (v/v = 4:1) developed a colorless band, from which product Im-H (51 mg, 91%) was obtained as a white solid (note that Im-H was separated by column chromatography and monitored by thin layer chromatography (TLC) using the fluorescent TLC plates covered with silica gel GF 254 under UV irradiation).

(ii) Product Im-H isolated from reaction of ImBF<sub>4</sub> with H<sub>2</sub> catalyzed by model **2**

The same procedure as that described in (i) was followed, but model **2** (11 mg, 25 μmol) was used instead of model **1**. Product Im-H (49 mg, 87%) was obtained as a white solid.

(iii) Product Im-H isolated from reaction of ImBF<sub>4</sub> with H<sub>2</sub> catalyzed by model **3**

The same procedure as that described in (i) was followed, but model **3** (15 mg, 25 μmol) was used instead of model **1**. Product Im-H (36 mg, 64%) was obtained as a white solid.

(iv) Product Im-H isolated from reaction of ImBF<sub>4</sub> with H<sub>2</sub> catalyzed by model **4**

The same procedure as that described in (i) was followed, but model **4** (14.5 mg, 25  $\mu\text{mol}$ ) was used instead of model **1**. Product Im-H (53 mg, 95%) was obtained as a white solid.

(v) Product Im-H isolated from reaction of  $\text{ImBF}_4$  with  $\text{H}_2$  catalyzed by model **5**

The same procedure as that described in (i) was followed, but model **5** (13.5 mg, 25  $\mu\text{mol}$ ) was used instead of model **1**. Product Im-H (38 mg, 68%) was obtained as a white solid.

(vi) Product Im-H isolated from reaction of  $\text{ImBF}_4$  with  $\text{H}_2$  catalyzed by model **6**

The same procedure as that described in (i) was followed, but model **6** (13 mg, 25  $\mu\text{mol}$ ) was used instead of model **1**. Product Im-H (50 mg, 89%) was obtained as a white solid.

10. Reactions of ImBF<sub>4</sub> with H<sub>2</sub> in the presence of AgBF<sub>4</sub> and Et<sub>3</sub>N catalyzed by models **1–6** and their *in situ* <sup>1</sup>H NMR spectra of the resulting reaction solutions (Fig. S25–S30)

(i) Reaction of ImBF<sub>4</sub> with H<sub>2</sub> catalyzed by model **1** and its *in situ* <sup>1</sup>H NMR spectrum of the resulting reaction solution

In an argon-filled glove box, a mixture of model **1** (2.4 mg, 5 μmol), AgBF<sub>4</sub> (1.0 mg, 5 μmol), ImBF<sub>4</sub> (15.5 mg, 50 μmol), Et<sub>3</sub>N (7.0 μL, 50 μmol) and 0.6 mL of CDCl<sub>3</sub> was added to a 5 mL test tube containing a magnetic stir-bar. The test tube was put to a 30 mL inner sleeve of the autoclave and then the autoclave was sealed. After 1.0 MPa H<sub>2</sub> was filled and released three times, the mixture was stirred under 1.0 MPa H<sub>2</sub> at room temperature for 8 h and then an equimolar Ph<sub>3</sub>CH (12.2 mg, 50 μmol) was added as internal standard. The resulting grey-black suspensions was filtered through a microfilter to give a yellowish solution, which was determined *in situ* by <sup>1</sup>H NMR spectroscopy to calculate its <sup>1</sup>H NMR yield (Fig. S25).

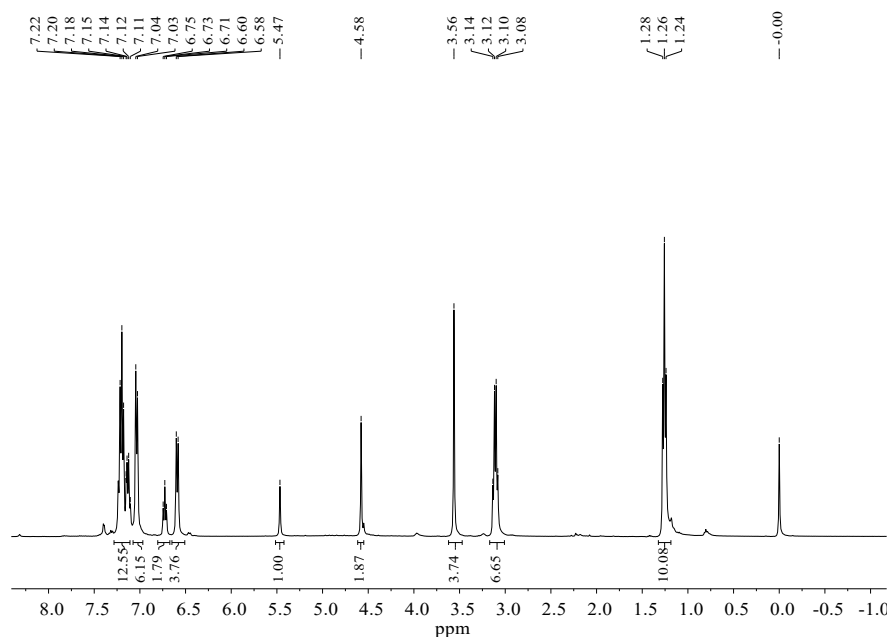

**Fig. S25** <sup>1</sup>H NMR spectrum of the resulting solution originated from reaction of ImBF<sub>4</sub> with 1.0 MPa H<sub>2</sub> catalyzed by model **1** in the presence of AgBF<sub>4</sub> and Et<sub>3</sub>N.

The <sup>1</sup>H NMR yield of product Im-H :

$$\frac{\text{integrated value of NCH}_2\text{N group in Im-H}}{2} = \frac{1.87}{2} \times 100\% = 94\%$$

(ii) Reaction of ImBF<sub>4</sub> with H<sub>2</sub> catalyzed by model **2** (2.3 mg, 5 μmol) and its *in situ* <sup>1</sup>H NMR spectrum of the resulting reaction solution.

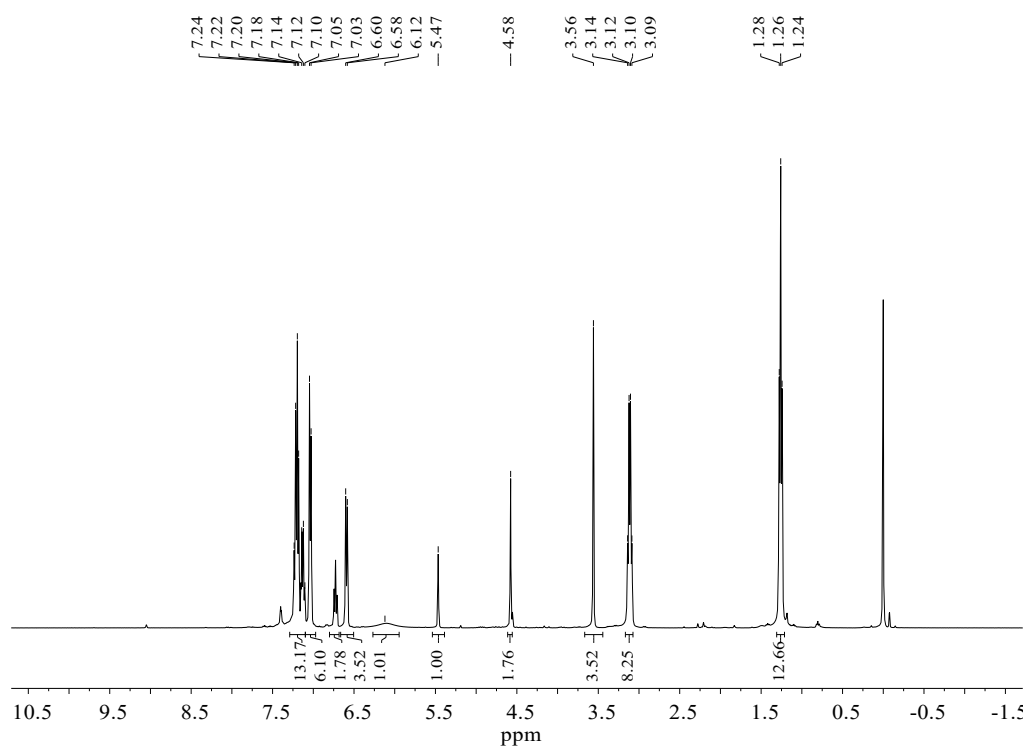

**Fig. S26** <sup>1</sup>H NMR spectrum of the resulting solution originated from reaction of ImBF<sub>4</sub> with 1.0 MPa H<sub>2</sub> catalyzed by model **2** in the presence of AgBF<sub>4</sub> and Et<sub>3</sub>N.

$$\text{The } ^1\text{H NMR yield of product Im-H} = \frac{1.76}{2} \times 100\% = 88\%$$

(iii) Reaction of ImBF<sub>4</sub> with H<sub>2</sub> catalyzed by model **3** (3.0 mg, 5 μmol) and its *in situ* <sup>1</sup>H NMR spectrum of the resulting reaction solution.

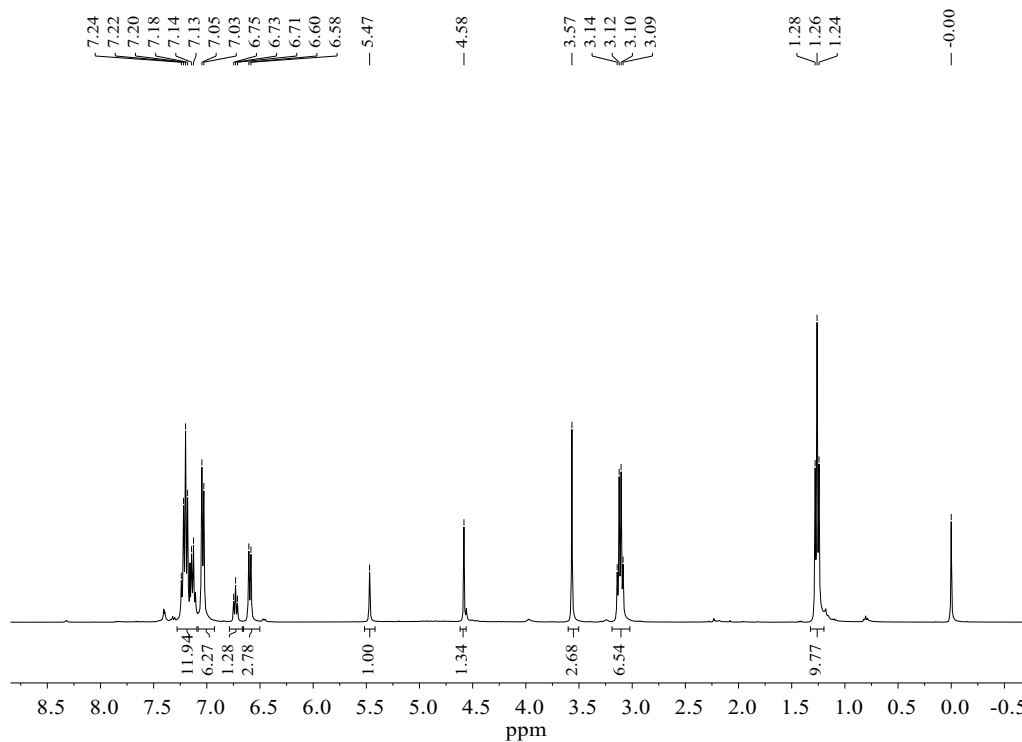

**Fig. S27** <sup>1</sup>H NMR spectrum of the resulting solution originated from reaction of ImBF<sub>4</sub> with 1.0 MPa H<sub>2</sub> catalyzed by model **3** in the presence of AgBF<sub>4</sub> and Et<sub>3</sub>N.

$$\text{The } ^1\text{H NMR yield of product Im-H} = \frac{1.34}{2} \times 100\% = 67\%$$

(iv) Reaction of  $\text{ImBF}_4$  with  $\text{H}_2$  catalyzed by model **4** (2.8 mg, 5  $\mu\text{mol}$ ) and its *in situ*  $^1\text{H}$  NMR spectrum of the resulting reaction solution

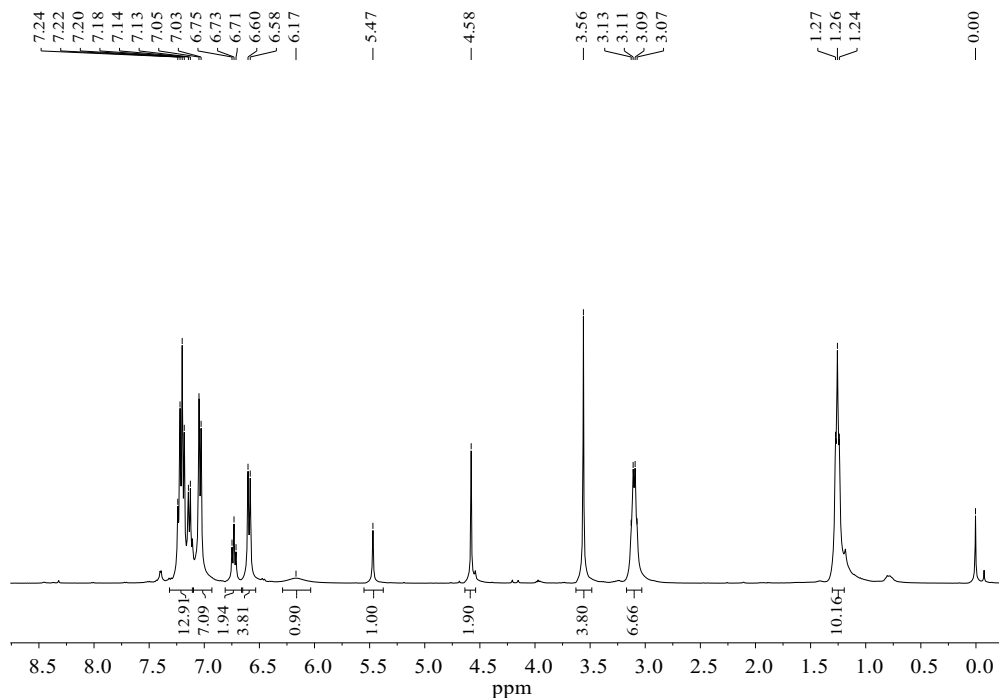

**Fig. S28.**  $^1\text{H}$  NMR spectrum of the resulting solution originated from reaction of  $\text{ImBF}_4$  with 1.0 MPa  $\text{H}_2$  catalyzed by model **4** in the presence of  $\text{AgBF}_4$  and  $\text{Et}_3\text{N}$ .

The  $^1\text{H}$  NMR yield of product Im-H =  $\frac{1.90}{2} \times 100\% = 95\%$

(v) Reaction of ImBF<sub>4</sub> with H<sub>2</sub> catalyzed by model **5** (2.7 mg, 5 μmol) and its *in situ* <sup>1</sup>H NMR spectrum of the resulting reaction solution.

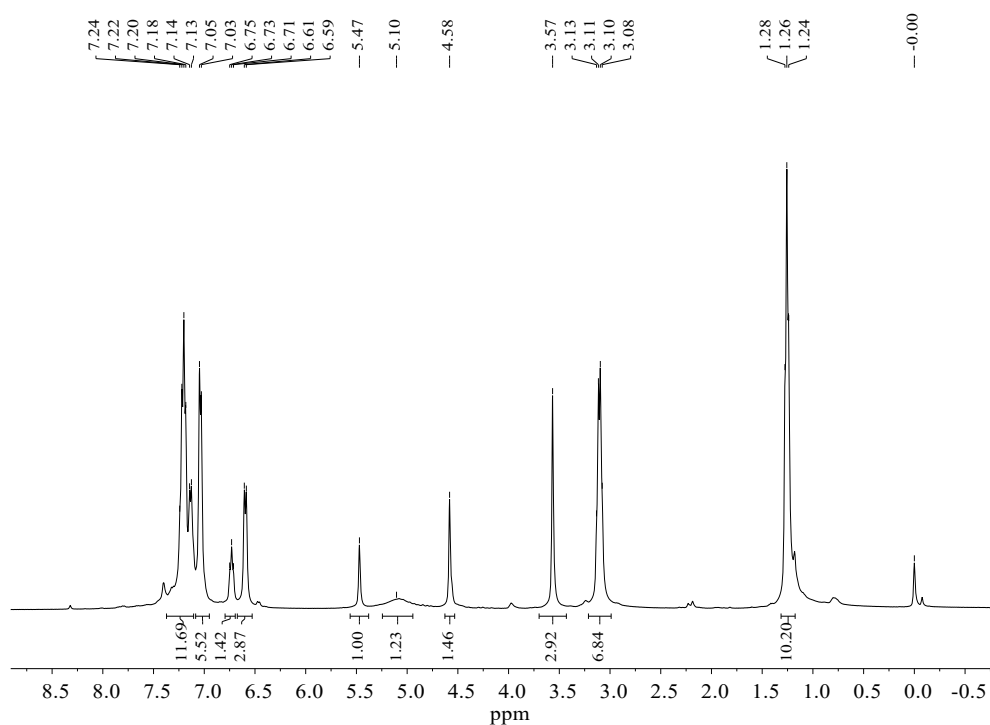

**Fig. S29** <sup>1</sup>H NMR spectrum of the resulting solution originated from reaction of ImBF<sub>4</sub> with 1.0 MPa H<sub>2</sub> catalyzed by model **5** in the presence of AgBF<sub>4</sub> and Et<sub>3</sub>N.

$$\text{The } ^1\text{H NMR yield of product Im-H} = \frac{1.46}{2} \times 100\% = 73\%$$



(vi) Reaction of  $\text{ImBF}_4$  with  $\text{H}_2$  catalyzed by model **6** (2.6 mg, 5  $\mu\text{mol}$ ) and its *in situ*  $^1\text{H}$  NMR spectrum of the resulting reaction solution.

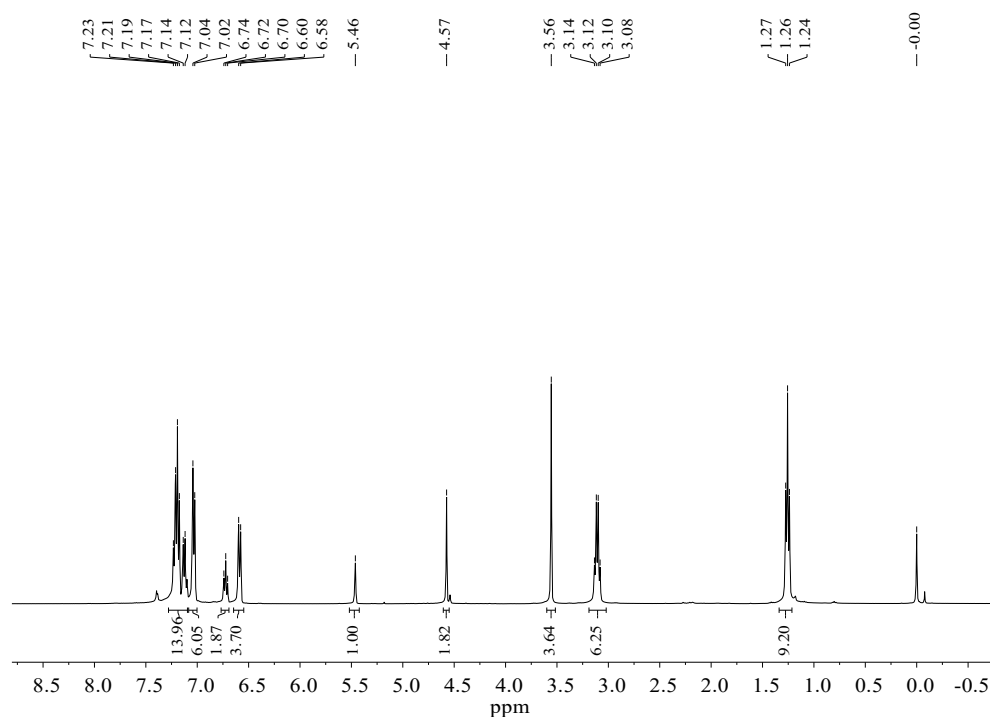

**Fig. S30.**  $^1\text{H}$  NMR spectrum of the resulting solution originated from reaction of  $\text{ImBF}_4$  with 1.0 MPa  $\text{H}_2$  catalyzed by model **6** in the presence of  $\text{AgBF}_4$  and  $\text{Et}_3\text{N}$ .

$$\text{The } ^1\text{H NMR yield of product Im-H} = \frac{1.82}{2} \times 100\% = 91\%$$
